# Supplementary material for: IMPLICON: an ultra-deep sequencing method to uncover DNA methylation at imprinted regions
Source: bioRxiv or medRxiv preprint supplement (doi:10.1101/2020.03.21.000042), 2020-03-23
Supplement: Supplementary file [file media-1.pdf]

**A**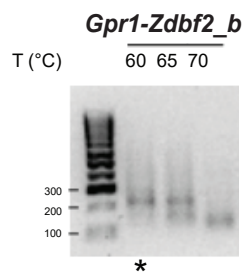**B**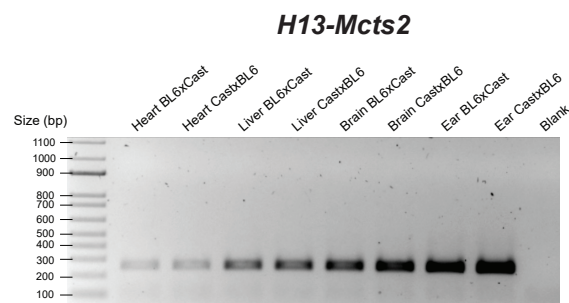**C**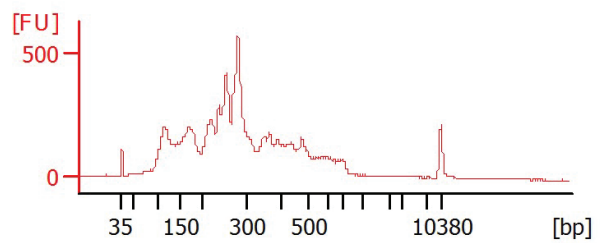

*Library after 1<sup>st</sup> PCR amplification and sample pooling*

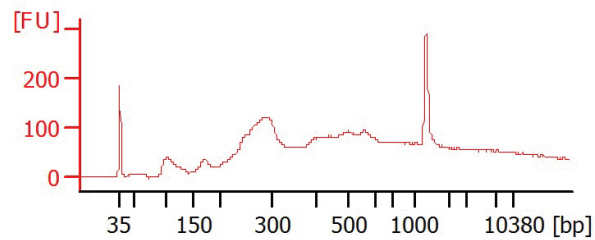

*Library after 2<sup>nd</sup> PCR amplification*

## Supplementary Figure 1

# Mouse\_allelic-specific

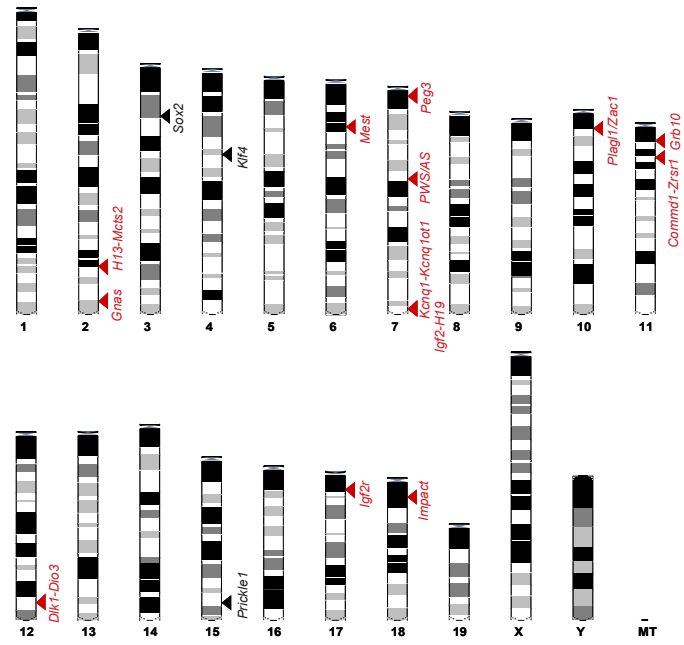

Supplementary Figure 2

# Human

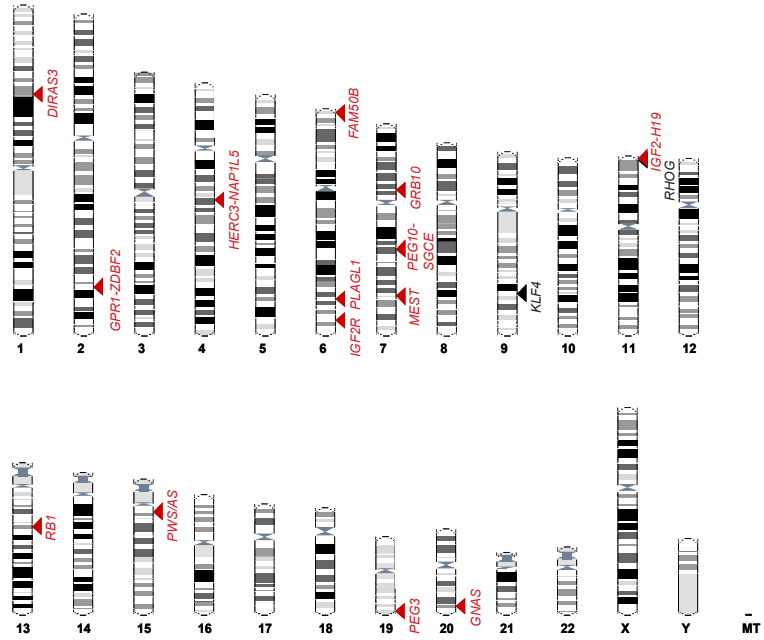

Supplementary Figure 3

## SUPPLEMENTARY FIGURE LEGENDS

### **Suppl. Fig. 1 – Steps of quality control of the IMPLICON method.**

- A. Agarose gel displaying the primer optimization step for 1<sup>st</sup> PCR for the *Gpr1\_Zdbf2\_b* primer pair on *Gpr1-Zdbf2* locus; primer pair was tested with different annealing temperatures in mouse ESCs; \*represents conditions chosen for the IMPLICON run.
- B. Agarose gel displaying an example of individual PCR reactions after the 1<sup>st</sup> PCR step, amplifying *H13-Mcts2* locus in different tissues (heart, liver, brain, ear) from F1 hybrid mice; Blank represents a negative water control.
- C. Library profiles obtained upon analysis on Agilent bioanalyzer after 1<sup>st</sup> PCR amplification and sample pooling (left) and after a 2<sup>nd</sup> PCR amplification and clean-up (right).

**Suppl. Fig. 2 – Schematic view of the murine karyotype depicting the location of the regions detected by allele-specific IMPLICON; black arrowheads – control regions; red arrowheads – imprinted regions.**

**Suppl. Fig. 3 – Schematic view of the human karyotype depicting the location of the regions detected by the human version of IMPLICON; black arrowheads – control regions; red arrowheads – imprinted regions.**

| Technique                                                 | Throughput | Costs     | Time      | Bisulfite conversion | Single CpG resolution | Advantages for imprinting analysis                                                         | Disadvantages for imprinting analysis                                                        | References                  |
|-----------------------------------------------------------|------------|-----------|-----------|----------------------|-----------------------|--------------------------------------------------------------------------------------------|----------------------------------------------------------------------------------------------|-----------------------------|
| WGBS - Whole genome bisulfite sequencing or MethylC-seq   | Low        | Very High | 2-4 weeks | Yes                  | Yes                   | Virtual representation of all imprinted regions at single base resolution                  | Low coverage of imprinted regions (~15x); Elaborate bioinformatics                           | Xie et al., 2012            |
| RRBS - reduced representation bisulfite sequencing        | Low        | High      | 2-4 weeks | Yes                  | Yes                   | Greater coverage than WGBS at the imprinted regions represented at single base resolution  | Absence of few imprinted clusters due to low genome coverage (10%); Elaborate bioinformatics | Stelzer et al., 2013        |
| MeDIP-seq - Methylated DNA Immunoprecipitation sequencing | Low        | High      | 2-4 weeks | No                   | No                    | No 5hmC detection                                                                          | Low base resolution; biases towards hypermethylated regions                                  | Proudhon et al., 2012       |
| Illumina Infinium MethylationEPIC array                   | Medium     | Medium    | 1-2 weeks | Yes                  | No                    | Catalog of MethylationEPIC probes for fast screening of human imprinted regions            | Relative measurement; High signal to noise ratio                                             | Hernandez Mora et al., 2018 |
| Long-read Nanopore Sequencing                             | Low        | Very High | 2-4 weeks | No                   | Yes                   | Long reads; Direct 5mC detection                                                           | Low coverage of imprinted regions (~10x); Elaborate bioinformatics                           | Gigante et al., 2019        |
| IMPLICON                                                  | High       | Low       | < 1 week  | Yes                  | Yes                   | Ultra-deep genomic coverage (>1000 reads) at single allele and single base pair resolution | A few imprinted regions to be added                                                          | This work                   |

**Suppl. Table 1 - Advantages and disadvantages of current high-throughput methods to quantify DNA methylation at imprinted regions.**

Abbreviations: 5hmC – 5’hydroxymethyl-cytosine; 5mC – 5’methyl-cytosine.

| <b>Imprinted cluster</b> | <b>Disease associated</b>                              | <b>Nazor et al., (2012):<br/>Infinium 450K BeadChip</b> | <b>Ma et al., (2014):<br/>Infinium 450K BeadChip</b> | <b>This study:<br/>IMPLICON</b> |
|--------------------------|--------------------------------------------------------|---------------------------------------------------------|------------------------------------------------------|---------------------------------|
| <i>DIRAS3</i>            | -                                                      | Tendency for Hypermethylation                           | Tendency for Hypermethylation                        | Normal                          |
| <i>GPR1/ZDBF2</i>        | -                                                      | -                                                       | -                                                    | Normal                          |
| <i>HERC3-NAP1L5</i>      | -                                                      | Tendency for Hypermethylation                           | Normal                                               | Tendency for Hypomethylation    |
| <i>FAM50B</i>            | -                                                      | -                                                       | -                                                    | Tendency for Hypomethylation    |
| <i>PLAGL1</i>            | Transient Neonatal Diabetes Mellitus                   | Tendency for Hypomethylation                            | Tendency for Hypomethylation                         | Tendency for Hypomethylation    |
| <i>IGF2R</i>             | -                                                      | -                                                       | -                                                    | Polymorphic imprinting          |
| <i>GRB10</i>             | -                                                      | Tendency for Hypomethylation                            | Normal                                               | Rare Hypomethylation            |
| <i>PEG10-SGCE</i>        | Silver-Russell syndrome                                | Normal                                                  | Normal                                               | Normal                          |
| <i>MEST</i>              | -                                                      | -                                                       | Normal                                               | Normal                          |
| <i>IGF2-H19</i>          | Silver-Russell syndrome;<br>Beckwith-Weideman syndrome | Tendency for Hypermethylation                           | Normal                                               | Tendency for Hypermethylation   |
| <i>RB1</i>               | -                                                      | -                                                       | -                                                    | Hypermethylation                |
| <i>PWS-AS</i>            | Prader-Willy syndrome;<br>Angelman syndrome            | Tendency for Hypomethylation                            | Normal                                               | Normal                          |
| <i>PEG3</i>              | -                                                      | Hypermethylation                                        | Hypermethylation                                     | Hypermethylation                |
| <i>GNAS</i>              | Sporadic<br>pseudohypoparathyroidism Ib                | Tendency for Hypomethylation                            | Rare Hypomethylation                                 | Hypomethylation                 |

**Suppl. Table 4 - Comparative analysis of methylation defects at imprinted regions in human induced pluripotent stem cells from three methylome studies.**
